# Supplementary material for: Chemical Composition and In Vitro Antioxidant Activity of Salvia aratocensis (Lamiaceae) Essential Oils and Extracts
Source: MDPI journal article supplement (doi:10.3390/molecules28104062), 2023-05-12
Supplement: s1 [file s1]

# Chemical composition and *in vitro* antioxidant activity of *Salvia aratocensis* (Lamiaceae) essential oils and extracts

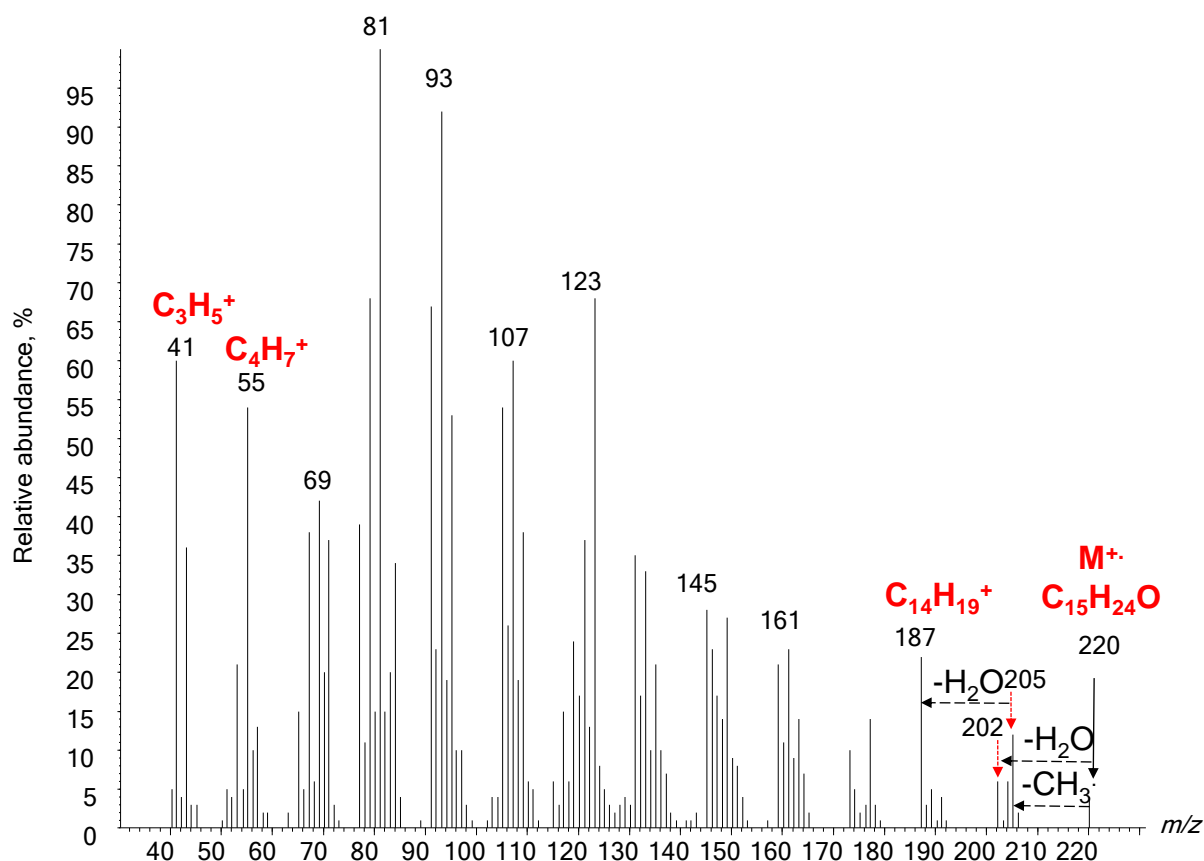

**Figure S1.** Mass spectrum obtained by GC/MS (EI, 70 eV) a sesquiterpenoid (peak N° 22 in Table 2, LRI 1665), found in the *S. aratocensis* EO distilled by microwave-assisted hydrodistillation (MWHD).

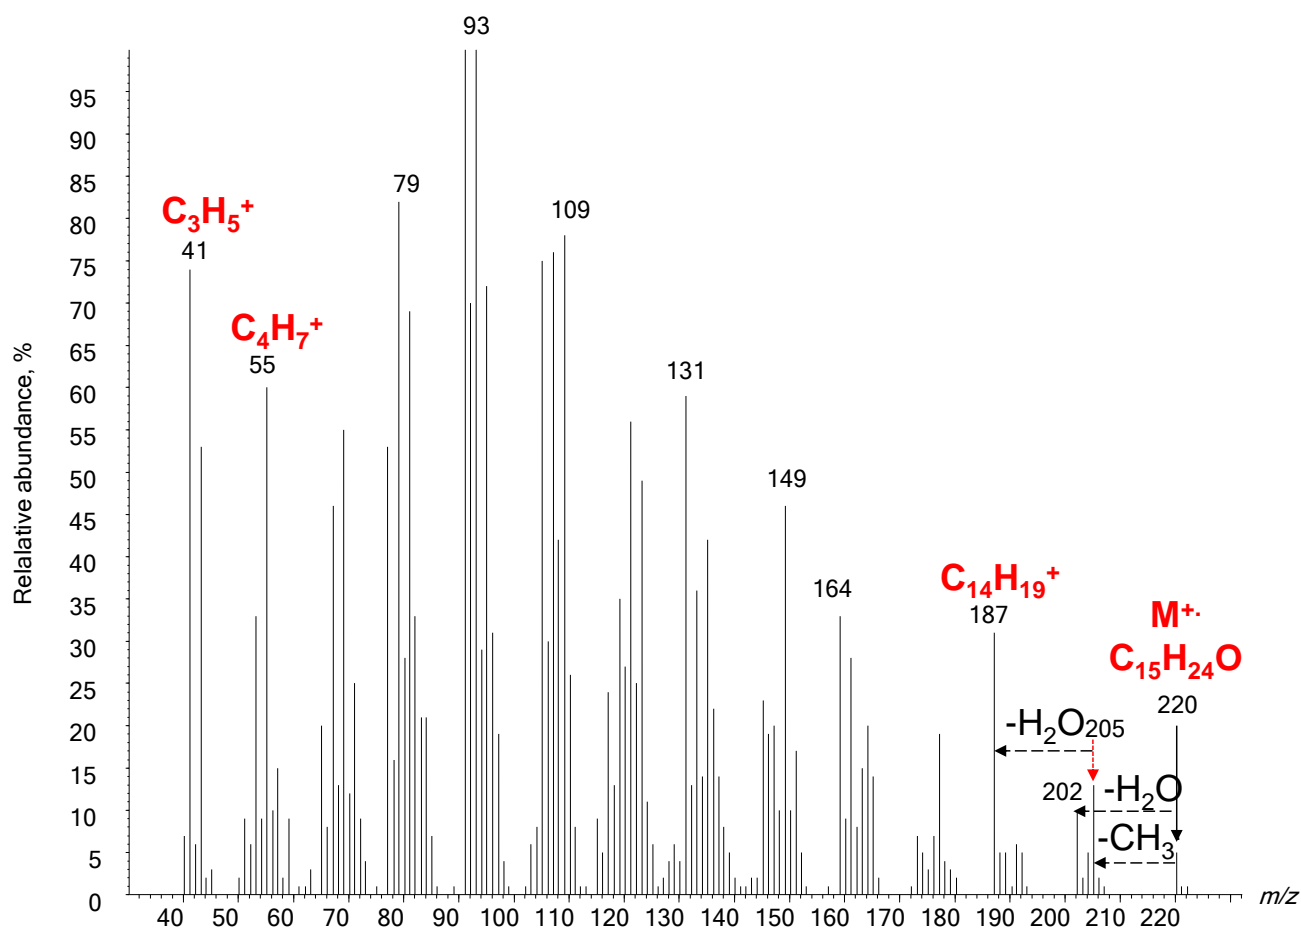

**Figure S2.** Mass spectrum obtained by GC/MS (EI, 70 eV) a sesquiterpenoid (peak N° 24 in **Table 2**, LRI 1683) in the *S. aratocensis* EO distilled by microwave-assisted hydrodistillation (MWHD).

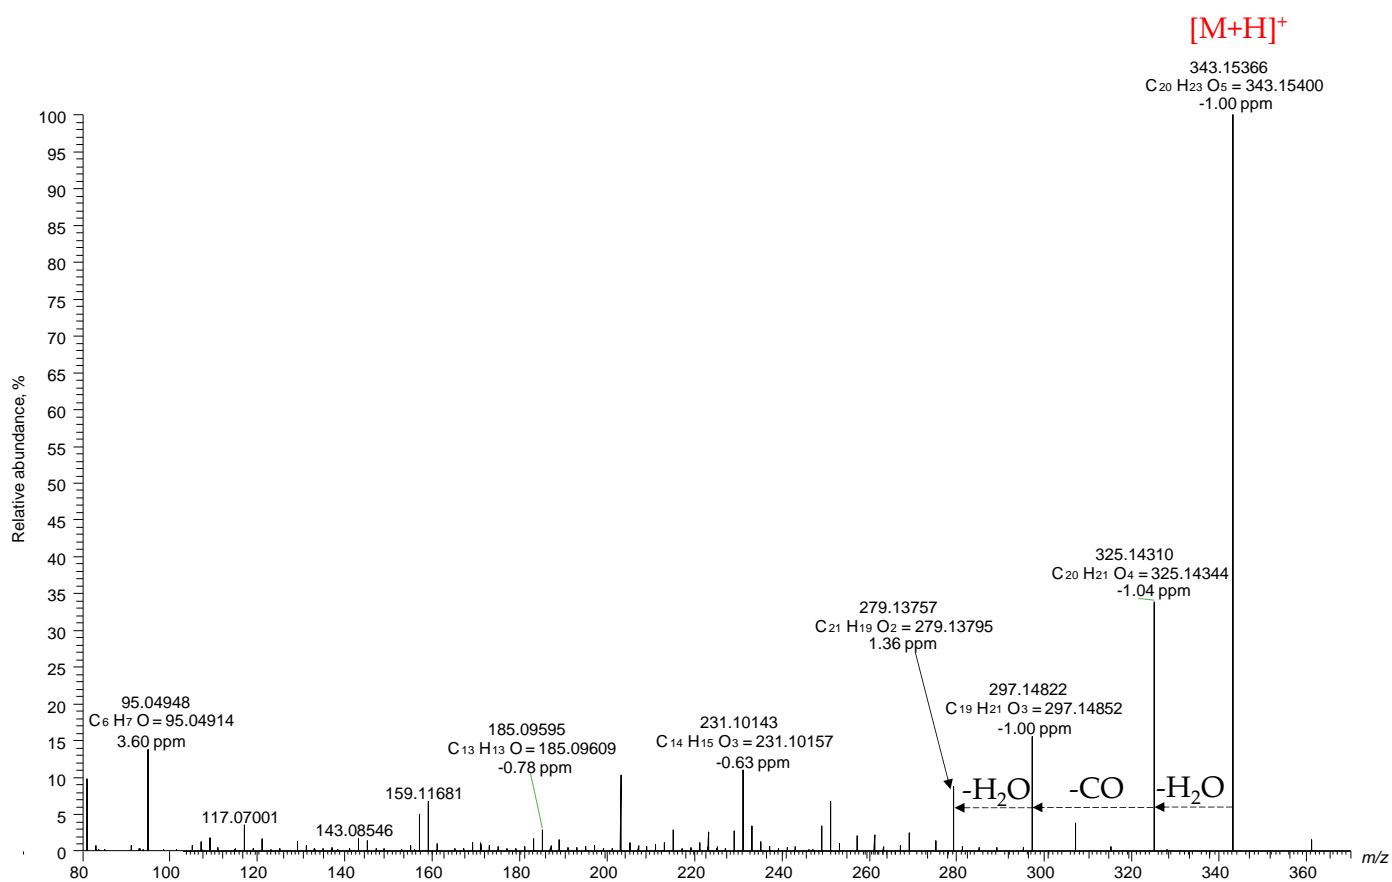

**Figure S3.** Mass spectrum obtained by UHPL-ESI<sup>(+)</sup>-Orbitrap-MS (SIM,  $m/z$  343; HCD, 20 eV) of the compound N° 11 (Table 3) present in the hydroethanolic extract of *S. aratocensis* obtained from fresh plant before distillation.

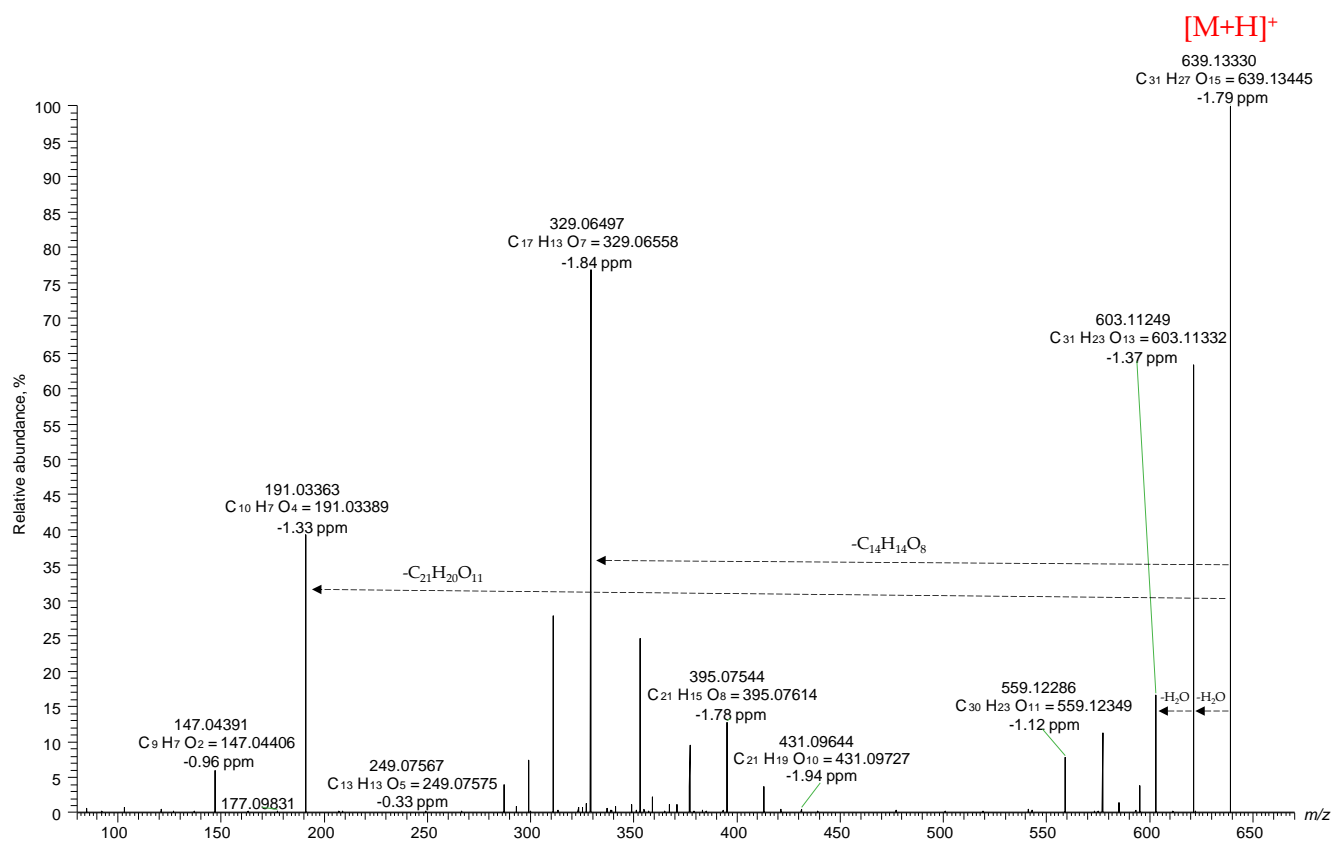

**Figure S4.** Mass spectrum obtained by UHPL-ESI<sup>(+)</sup>-Orbitrap-MS (SIM,  $m/z$  639; HCD, 20 eV) of the compound N° 15 (Table 3) present in the hydroethanolic extract of *S. aratocensis* obtained from fresh plant before distillation.

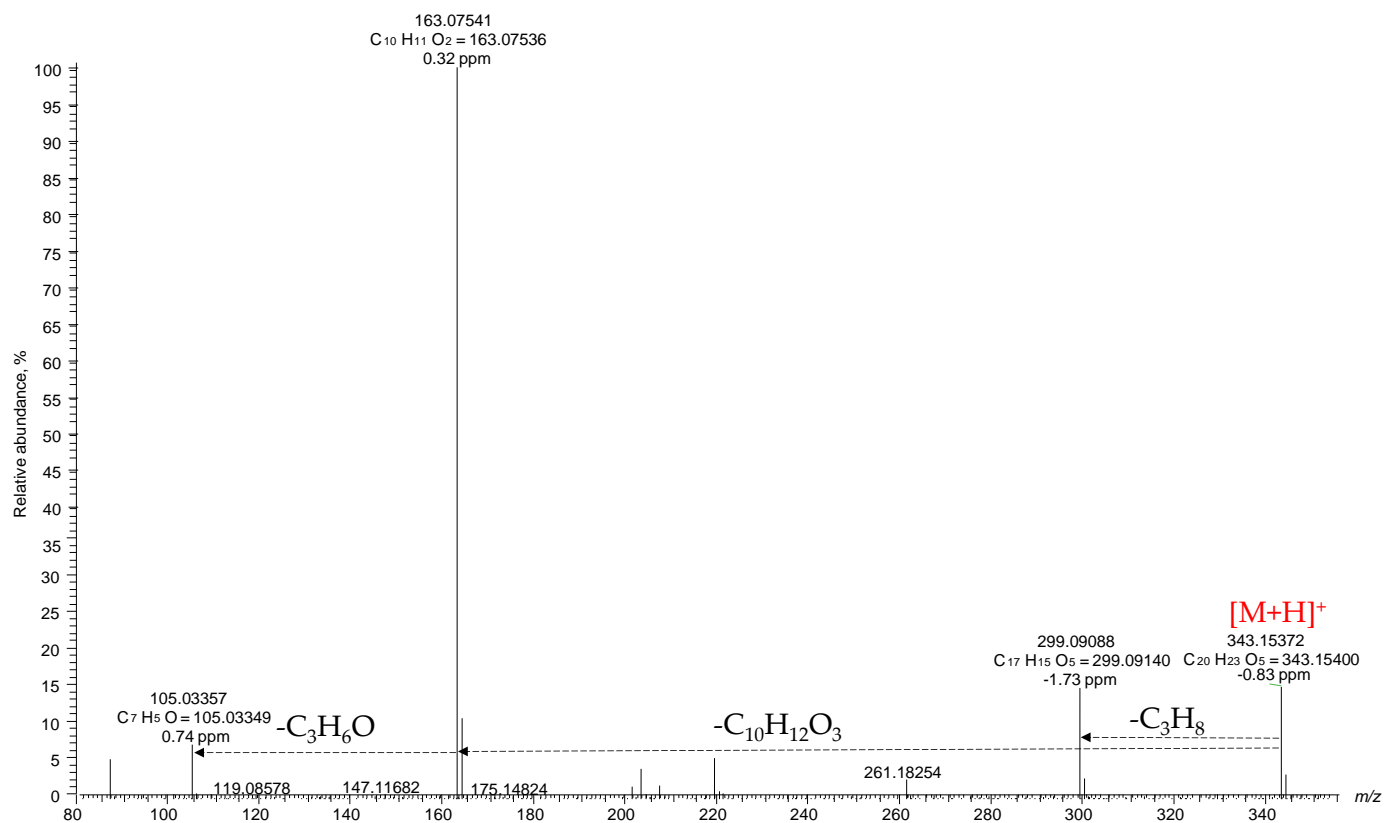

**Figure S5.** Mass spectrum obtained by UHPL-ESI<sup>(+)</sup>-Orbitrap-MS (SIM,  $m/z$  343; HCD, 20 eV) of compound N° 23 (Table 3) present in the hydroethanolic extract of *S. aratocensis* obtained from vegetal material before distillation.
